# Supplementary material
Source: PubMed Central journal article supplement (PMC3032465)
Supplement: pp.110.166272_2.pdf [file pp.110.166272_2.pdf]

Supplemental Table 1. Complementation of *sly1-10*.

| Construct           |                                                                                     | Degree of restoration |          |           |                   |
|---------------------|-------------------------------------------------------------------------------------|-----------------------|----------|-----------|-------------------|
| Name                | Diagram                                                                             | Total                 | WT       | Partial   | <i>sly1</i> -like |
| <i>HA-SLY1</i>      |    | 7                     | <b>6</b> | 1         | 0                 |
| <i>HA-sly1-ΔN</i>   |    | 8                     | 0        | <b>8</b>  | 0                 |
| <i>HA-sly1-ΔF</i>   |    | 12                    | 0        | 0         | <b>12</b>         |
| <i>HA-sly1-ΔC</i>   |    | 12                    | 0        | 0         | <b>12</b>         |
| <i>HA-SNE</i>       |    | 20                    | 0        | <b>17</b> | 3                 |
| <i>HA-sne-ΔN</i>    |    | 6                     | 0        | <b>6</b>  | 0                 |
| <i>HA-sne-ΔF</i>    |   | 13                    | 0        | 0         | <b>13</b>         |
| <i>HA-sne-ΔC</i>    |  | 12                    | 0        | 0         | <b>12</b>         |
| <i>HA (control)</i> |  | 8                     | 0        | 0         | <b>8</b>          |
