# Supplementary material
Source: PubMed Central journal article supplement (PMC3032465)
Supplement: pp.110.166272_3.pdf [file pp.110.166272_3.pdf]

**Supplemental Table 2. Primer sequences.**

| Primer Name | 5' to 3' Sequence                     | Purpose                        |
|-------------|---------------------------------------|--------------------------------|
| SLY1orf-F   | ATGAAGCGCAGTACTACCGA                  | HA-SLY1 construction           |
| SLY1orf-R   | TTATTTGGATTCTGGAAGAGGTCTC             | HA-SLY1 and HA-SLY1ΔF          |
| SLY1-Ndel-F | ATGTTCTCCAATTTAGACGAGAATC             | HA-SLY1ΔN with SLYorf-R        |
| SLY1-Fbox-F | ATCGGACGTCCTGACTAACATC                | HA-SLY1ΔF with SLYorf-R        |
| SLY1-Cdel-R | TTAGAGAGGCCAGAGGTAAA                  | HA-SLY1ΔC with SLYorf-F        |
| SLY1-Fbox-R | CTAAGTACAGATCAGCTCCCAAAGCC            | HA-SLY1ΔF                      |
| SNEorf-F    | ATGTCGTCGGAGAAACGTGT                  | HA-SNE constructs              |
| SNEorf-R    | AAGAAACAGGAGTGGGAAAAAATCACG           | HA-SNE with SNEorf-R           |
| SNE-Ndel-F  | ATGAGCATCAACGACCACCACGACG             | HA-SNEΔN with SNEorf-R         |
| SNE-Fbox-F  | TTCCCCGACAAGTGTCCACCACGACC            | HA-SNEΔF with SNEorf-R         |
| SNE-Fbox-R  | TTGTCGGGGAAGTGGTTCCTCTTTG             | HA-SNEΔF with SNEorf-F         |
| SNE-Cdel-R  | TCGTGTTCAAAGAAGCTTAGG                 | HA-SNEΔC with SNEorf-F         |
| FLAG-F      | ATGGACTACAAAGACGATGACGACAAGCAT<br>ATG | FLAG-SLY1                      |
| FLAG-R      | CATGGGCTGCAGGAATTCGCCCTT              | FLAG-SLY1                      |
| RGA254      | AGAAGCAATCCAGCAGA                     | qRT-PCR of RGA mRNA            |
| RGA255      | GTGTACCTCTTCCTTACCTT                  | qRT-PCR of RGA mRNA            |
| GAPcF2      | AGCTGCTACCTACGATG                     | qRT-PCR of GAPc mRNA           |
| GAPcR2      | CACACGGGAACTGTAACAGA                  | qRT-PCR of GAPc mRNA           |
| SLY1pro-F   | CCCAAAAACGCAAACAGTTGGC                | 2-kb- <i>SLY1</i> promoter-GUS |
| SLY1pro-R   | GTGGAATCGATTGCGAAGATC                 | 2-kb- <i>SLY1</i> promoter-GUS |
